# Supplementary material for: Cost and feasibility: an exploratory case study comparing use of a literature review method with questionnaires, interviews and focus groups to identify barriers for a behaviour–change intervention
Source: BMC Health Serv Res. 2015 May 29;15:211. doi: 10.1186/s12913-015-0877-1 (PMC4446861; doi:10.1186/s12913-015-0877-1)
Supplement: Additional file 1: — Cost Estimation. Project one. [file 12913_2015_877_MOESM1_ESM.xlsx]

## Sheet: Summary Sheet
Cost Estimation
Project one
	Topic selection and barrier identification
	Resources Used
							Team Labour (Time taken away from other productive activities dedicated to Project one)
					Estimated Labour Month Cost for 'major contributors' (Capital, Oncosts included in Labour price estimation)		Estimated Months Equivalent (figures based on estimates provided by each team member)		ESTIMATED LABOUR COSTS
						Estimated Labour Week Cost for 'minor contributors' (Capital, Oncosts included in Labour price estimation)		Estimated Weeks Equivalent (figures based on estimates provided by each team member)
								Limited to project 1 topic selection and barrier identification work
Team Labour Costs
	University	Researcher (R) 1 (reviewed evidence relating to clinical topic targeted)			3821.06		5.05		19296.3
	University	R2 (advised on survey design and oversaw review of evidence relating to clinical topic targeted)				1339.32		0.2	267.864
	University	R3 (lead on survey design and analysis)			3821.06		11.15		42604.8
	University	R4 (lead on design, conduct and analysis of qualitative interviews and oversaw survey administration process)			4598.32		8.3		38166.1
	NHS	NHS1			4233.36		0.8		3386.69
	NHS	NHS2			3618.46		21.75		78701.6
	NHS	NHS3			4233.36		2.875		12170.9
	NHS	NHS4			2984.11		8		23872.8
	NHS	NHS5 (research project facilitator)			3618.46		1.6		5789.54
	NHS	NHS6			4233.36		0		0
		NOTES: NHS 1,2,3,4, and 6 collectively helped with topic selection activities and helped to organise and lead on administration of the questionnaire and the contacting and chasing up of interview participants
Direct Project 1 Support Costs
				NOTES
		Printing & Photocopying	3152.44	Bills equal to 1580.14 under Photocopying Expenses & 1572.22 under Printing Correspond with project time period on transaction record
		Cost of Delivering Surveys	1200	About 1200 surveys were sent out with return stamped envelopes - estimate 1 per SURVEY for delivery
Summary
	Labour_university		100335
	Labour_NHS		123922
	Direct Project Support Costs		4352.44
	Totals		228609
